## ***Dicer-like 5* deficiency confers temperature-sensitive male sterility in maize**

**Authors:** Chong Teng<sup>1†</sup>, Han Zhang<sup>2†</sup>, Reza Hammond<sup>3</sup>, Kun Huang<sup>3</sup>, Blake C. Meyers<sup>1,4\*</sup>,  
Virginia Walbot<sup>2\*</sup>

### **Affiliations:**

<sup>1</sup>Donald Danforth Plant Science Center, 975 N. Warson Rd, St. Louis, MO 63132, USA.

<sup>2</sup>Department of Biology, Stanford University, Stanford, CA 94305, USA.

<sup>3</sup>Delaware Biotechnology Institute, University of Delaware, Newark, DE 19716, USA.

<sup>4</sup>University of Missouri – Columbia, Division of Plant Sciences, 52 Agriculture Lab, Columbia, MO 65211, USA.

**\*Correspondence to: walbot@stanford.edu (V.W.); bmeyers@danforthcenter.org (B.C.M.)**

**†**These authors contributed equally to this work.

## 1 **Abstract**

2           Small RNAs play important roles during plant development by regulating  
3 transcript levels of target mRNAs, maintaining genome integrity, and reinforcing DNA  
4 methylation. *Dicer-like 5 (Dcl5)* is proposed to be responsible for precise slicing to  
5 generate diverse 24-nt phased, secondary small interfering RNAs (phasiRNAs), which  
6 are exceptionally abundant in meiotic anthers of maize, rice, and other grasses <sup>1</sup>. The  
7 importance and functions of these phasiRNAs remain unclear. Here, we used the  
8 Clustered Regularly Interspaced Short Palindromic Repeats (CRISPR) *Cas9* system to  
9 mutate *Dcl5*. We report that *dcl5* mutants have few or no 24-nt phasiRNAs, develop short  
10 anthers and defective tapetal cells, and exhibit temperature-sensitive male fertility. We  
11 propose that DCL5 and 24-nt phasiRNAs are critical for fertility under growth regimes  
12 for optimal yield.

13

## 14 **Introduction**

15           Three major classes of endogenous small RNAs (sRNAs) exist in plants:  
16 microRNAs (miRNAs), heterochromatic small interfering RNAs (hc-siRNAs), and  
17 phased, secondary small interfering RNAs (phasiRNAs). From extensive sRNA  
18 sequencing in plants, numerous loci generating phasiRNAs have been reported; in  
19 grasses, phasiRNAs are enriched in flowers, particularly male reproductive organs <sup>1-4</sup>.  
20 PhasiRNA production is initiated by miRNA-mediated cleavage of RNA polymerase II  
21 transcripts of two classes of *PHAS* loci. Subsequently, the 3' portion of cleaved  
22 transcripts is converted to double-stranded RNA, a substrate for precise chopping by  
23 DICER-LIKE 4 (DCL4) yielding 21-nt products; a distinct, proposed role for DCL5 is in

24 the generation of 24-nt phasiRNAs<sup>2-4</sup>. The 21-nt phasiRNAs are highly abundant during  
25 initial cell fate setting in maize anthers<sup>1</sup> and are important for male fertility in rice<sup>5,6</sup>.  
26 The 24-nt phasiRNAs accumulate coincident with meiotic start, peak during meiosis, and  
27 persist at lower levels afterwards; this pattern has generated speculation that they regulate  
28 meiosis<sup>7,8</sup>.

29

30 In angiosperms, five DCLs have been described and partially characterized<sup>9</sup>.  
31 DCL1 is important for miRNA biogenesis, as illustrated by regulation of meristem  
32 determinacy in maize inflorescences<sup>10</sup>. In *Arabidopsis thaliana*, DCL2 processes viral-  
33 and transgene-derived siRNAs<sup>11</sup>; DCL3 produces 24-nt hc-siRNAs, which then direct  
34 DNA methylation of target loci<sup>12</sup>. In many plants including *Oryza sativa* (rice), DCL4  
35 generates 21-nt *trans*-acting siRNAs and phasiRNAs<sup>3</sup>. Although the functions of these  
36 four *DICER-LIKE* genes are well conserved in flowering plants, these genes have  
37 partially overlapping functions<sup>11,13</sup>. A fifth, more recently discovered gene, *Dcl5*, is  
38 monocot-specific<sup>9</sup>. To better understand the function of DCL5 and its proposed role in  
39 24-nt phasiRNA biogenesis<sup>1</sup>, we characterized maize *dcl5* mutants generated using a  
40 high efficiency CRISPR-mediated gene editing system<sup>14</sup>.

41

## 42 **Results**

### 43 Loss-of-function mutants of the maize *Dcl5* gene confer male-sterility

44 We picked four alleles for analysis (Fig. 1A), and from T<sub>0</sub> plants we developed  
45 stable lines that show Mendelian inheritance of each *dcl5* allele (Fig. 1B, Table S1, and  
46 Fig. S1). *dcl5-1* and *dcl5-4* are frameshift mutants with transcript levels down-regulated

47 to about a third of their wild type siblings; in contrast, *dcl5-2* (3 bp deletion) and *dcl5-3*  
48 (12 bp deletion, 1 bp substitution) have similar or higher transcript levels compared to  
49 control siblings (Fig. 1B and Fig. S2). Wild type and heterozygous *dcl5-1//Dcl5* plants  
50 greenhouse-grown at 32° C maximum day/21° C minimum night were identical in whole  
51 plant architecture, anther morphology, and fertility. Under the same conditions,  
52 homozygous *dcl5-1* plants were male sterile (Fig. 1C). Compared to their fertile siblings,  
53 sterile *dcl5-1* plants lacked visible differences in tassels and spikelets, however, the  
54 sterile anthers were shorter, contained shrunken pollen, and did not exert from the  
55 spikelets (Fig. 1C and Fig. S3). Sporadically, a few anthers exerted and shed viable  
56 pollen. Under field conditions, all four alleles showed equivalent levels of male sterility.  
57 No genomic editing can be detected in the homologous sequence in *Dcl3* which is the  
58 most likely potentially off-target locus (Fig. S4). We concluded that *Dcl5* is required for  
59 robust male fertility.

60

#### 61 *dcl5-1* mutants exhibit tapetal defects

62 To investigate whether *dcl5-1* plants display defects in anther cell patterning, we  
63 used confocal microscopy and found normal somatic layer architecture without defects in  
64 initial cell differentiation (Fig. S5). In addition, chromosome pairing, alignment, and  
65 meiotic progression were normal in *dcl5-1* meiocytes (Fig. S6). The *dcl5-1* meiocytes  
66 routinely complete meiosis and produce haploid gametophytes. Transmission electron  
67 microscopy was utilized to visualize nuclei and other cell organelles at higher resolution.  
68 During mid-meiosis (2 to 2.5 mm anthers), normal tapetal cells were densely packed with  
69 dark-staining materials and were mostly binucleate (Fig. 2A and Fig. S7). In contrast, the

70 tapetal cells in *dcl5-1* were pale and mostly mononucleate, and many cell organelles were  
71 not clearly resolved (Fig. 2B and Fig. S7). Whole mount, fluorescence microscopy was  
72 used to quantify binucleate status in *dcl5-1* and fertile anthers. In 1.5 mm anthers  
73 (prophase I), there were five-fold fewer binucleate tapetal cells in *dcl5-1*, and a  
74 significant difference persisted at 2.5 mm (meiosis II) (Fig. 2 and Fig. S8). In extensive  
75 confocal microscopic examination of *dcl5-1* anthers, we observed no significant or  
76 consistent differences in cell number or volume compared to fertile siblings.  
77 Collectively, these observations indicate that tapetal development is delayed or arrested  
78 and that the *dcl5-1* tapetal cells are therefore likely defective in conducting post-meiotic  
79 functions supporting pollen maturation.

80

81 *Dcl5* is exclusively expressed in the meiocytes and tapetal cells at the onset of meiosis

82 To obtain a comprehensive spatiotemporal profile of maize *Dcl5* expression, we  
83 queried microarray, published and newly generated RNA-seq (Table S2), and proteomics  
84 data. *Dcl5* transcripts are highly enriched in tassels, cobs, embryos, and seeds<sup>15,16</sup>, and in  
85 fertile anthers. In contrast, DCL5 protein is low in 1.0 mm, pre-meiotic anthers and  
86 extremely high in 2.0 mm mid-meiosis anthers, but is undetectable in ear, embryo, or  
87 endosperm<sup>17</sup>. Microarray analysis of laser-microdissected anther cell types<sup>18,19</sup> and *in*  
88 *situ* hybridization analysis of anther lobes<sup>1,20</sup> established that *Dcl5* transcripts are highly  
89 enriched in the tapetum and are present at lower levels in pre-meiotic pollen mother cells  
90 and meiocytes. RNA-seq confirmed *Dcl5* expression in isolated maize meiocytes,  
91 however, quantitatively there are even higher levels in whole anthers<sup>21</sup>, as confirmed by  
92 newly-generated anther data (Table S2). Therefore, *Dcl5* is expressed much more highly

93 in one or more somatic cell types than in meiocytes<sup>21</sup>. Integrating prior observations that  
94 24-nt phasiRNA biogenesis is contingent on a normal tapetum<sup>1</sup>, with the peak of *Dcl5*  
95 and DCL5 expression in meiotic anthers, we conclude that the 24-nt phasiRNA pathway  
96 is localized in tapetal cells. We hypothesize that this localization and timing is of  
97 functional importance for the redifferentiation of tapetal cells into secretory cells.

98

99 24-phasiRNAs abundance is greatly reduced in *dcl5* mutants. To investigate if 24-  
100 nt phasiRNA biogenesis is affected in *dcl5* mutants, sRNA libraries were constructed  
101 from anthers or spikelets of each *dcl5* allele (Table S2). Previously, we found that 24-nt  
102 phasiRNAs were readily detected from 176 24-*PHAS* loci in W23 inbred anthers<sup>1</sup>. The  
103 24-nt sRNAs produced from all these loci were reduced dramatically in plants  
104 homozygous for each *dcl5* allele compared to fertile siblings even though *dcl5-2* and  
105 *dcl5-3* encode proteins that lack only a few amino acids (Fig. 3). Other sRNAs, including  
106 24-nt hc-siRNAs and 21-nt phasiRNAs were retained (Fig. S9). We conclude that *Dcl5* is  
107 required for 24-nt phasiRNA biogenesis and that the *dcl5-2* and *dcl5-3* mutations define  
108 amino acids essential for DCL5 function. Analysis of 24-*PHAS* precursors in RNA-seq  
109 anther libraries from the same plants showed greater or nearly the same levels of  
110 precursor abundance in each of the *dcl5* mutant alleles<sup>4</sup> (Fig. S10). Therefore, the  
111 absence of functional DCL5 severely disrupts 24-nt phasiRNA precursor processing with  
112 a modest impact on their accumulation.

113

114 Analysis of these RNA-seq data to characterize downstream transcriptional  
115 pathways impacted in *dcl5* mutants was uninformative, consistent with prior results that

116 failed to identify mRNA targets for 24-nt phasiRNAs<sup>1</sup>. The transcriptional changes in  
117 *dcl5-1* mutants were minimal with many of these impacted transcripts being downstream  
118 effects of the arrested tapetal development (Table S3) and proximal genes were not  
119 impacted; alterations in the transcript population are likely indirect and reflective of  
120 defective tapetal development.

121

### 122 *dcl5-1* mutants are temperature-sensitive male sterile

123 *dcl5-1* field-grown plants exhibited variable fertility under typical summer  
124 conditions in Stanford, CA: 25/18° C interrupted by multi-day heat waves exceeding 32°  
125 C. To test whether temperature is a restrictive condition, three controlled greenhouse  
126 regimes were chosen -- 28/22° C, 26/20° C, and 23/20° C (14 h day/10 h night  
127 temperature) -- and maintained within narrow limits over the life cycle (Fig. 4). At 28/22°  
128 C, *dcl5-1* mutants had shorter anthers that never exerted, while heterozygous siblings  
129 developed normally. In contrast, under both the 26/20° C and 23/20° C regimes, *dcl5-1*  
130 mutants were partially to fully fertile; pollen was viable based on Alexander staining  
131 despite a prolonged life cycle and delayed flowering date under cooler temperatures (Fig.  
132 S11). We also compared *dcl5-1* transcript levels, 24-nt phasiRNA production, and *PHAS*  
133 precursor accumulation in *dcl5-1* plants under restrictive and permissive temperature and  
134 we observed no significant differences (Fig. 3, Fig. S2 and Fig. S10). Our interpretation  
135 is that the functions of *Dcl5* and 24-nt phasiRNAs are dispensable for maize male fertility  
136 at low temperatures (23/20° C) but are required at higher temperatures. Cool  
137 temperatures slow the pace of development and may allow alternative pathways  
138 independent of the 24-nt phasiRNAs to support tapetal cell redifferentiation.

139

140           Maize tassels contain anthers representing six days of development<sup>22</sup>, and we  
141 wondered if sporadic anther exertion in *dcl5-1* plants reflected a short phenocritical  
142 period when some anthers experienced permissive conditions. Homozygous *dcl5-1* plants  
143 were greenhouse-grown at 28/22° C until the tassel inflorescence formed (~30 days), then  
144 plants were moved into two walk-in chambers: permissive 23/20° C or restrictive 28/22°  
145 C regimes. In the next three weeks, 14 sets of three plants were swapped between the two  
146 regimes for 3, 6, 9, 12, 15, 18 or 21 days, and then all plants finished their life cycle in  
147 the 28/22° C greenhouse (Fig. S12). Plants in the 23/20° C regime from the start of  
148 meiosis through the release of mononucleate microspores (~9 day period, swaps 7 to 11,  
149 Fig. S12) were fully fertile. Sample plants were assessed during the 6<sup>th</sup> through 9<sup>th</sup> days  
150 to check anther staging in the main tassel spike, confirming that this interval corresponds  
151 to meiosis and post-meiotic stages in the most mature part of the tassel. These stages also  
152 encompass the initiation, peak, and continued presence of 24-nt phasiRNAs in normal  
153 anthers<sup>1</sup>. Plants in the permissive temperature for fewer than nine days during this  
154 interval had reduced fertility; we hypothesize that this extended interval is required to  
155 allow all anthers to proceed through the phenocritical period to ensure full fertility. The  
156 temperature swap experiment demonstrates that there is a short period in which DCL5 is  
157 required to “buffer” development at elevated temperatures. Surprisingly, the restrictive  
158 temperature is similar to what is considered optimal day temperature for the U.S. corn  
159 belt; historical data indicate that growth between 20° to 29° C generates optimal yield,  
160 with higher yields associated with warmer temperatures within this range<sup>23,24</sup>.

161



162 **Discussion**

163 Maize DCL5 is essential for robust male fertility: *dcl5* plants are temperature-  
164 sensitive during meiosis, show arrested tapetal development at this stage, and lack 24-nt  
165 phasiRNAs. In rice, perturbed 21-nt, premeiotic phasiRNAs confer photoperiod and  
166 temperature-sensitive male fertility<sup>25-27</sup>. Molecular and *in situ* analyses indicate that the  
167 24-nt phasiRNA biogenesis factors and these sRNAs are located primarily in the tapetum  
168 <sup>1</sup>. For maize, we conclude that 24-nt phasiRNAs play a direct role in tapetal  
169 redifferentiation and only an indirect role in meiocytes or gametophytes. We hypothesize  
170 that the 24-nt phasiRNAs are essential for tapetal redifferentiation for biosynthesis and  
171 secretion of materials that support haploid microgametophytes. The molecular  
172 mechanisms by which 21- and 24-nt reproductive phasiRNAs act remain unclear.

173

174 Our study in maize establishes that DCL5 plays a unique role, having  
175 subfunctionalized from DCL3 for 24-nt phasiRNA biogenesis in anthers. *Dcl5* transcripts  
176 are still expressed in diverse organs, however, protein and critical functions are restricted  
177 to anthers. Expression analysis found just 23 genes differentially expressed in our *dcl5-1*  
178 mutants, but all of these are likely reflective of arrested tapetal development. That the  
179 thousands of 24-nt phasiRNAs fail to impact mRNA abundances significantly indicates  
180 that 24-nt phasiRNAs are distinct from tasiRNAs which do have specific mRNA targets  
181 and modulate transcript abundances. DCL5 and therefore the 24-nt phasiRNAs are  
182 dispensable at cool growing temperatures for maize, however, DCL5 is required for  
183 robust fertility at temperatures for optimal yield in the U.S. corn belt. As climate  
184 disruption, including more extensive heat waves, and a general warming trend increase

185 field temperatures, buffering maize tapetal development from adverse effects may be  
186 possible by enhancing 24-nt phasiRNA functions. The 24-nt phasiRNAs may permit  
187 development during other untested environmental challenges. Given the high degree of  
188 variation typically observed across maize inbreds for many traits, the *dcl5* mutant  
189 phenotype may vary across inbreds. More generally, it is unknown how many crop plants  
190 utilize reproductive phasiRNAs and whether their tapetal health and functions could  
191 benefit by introduction or optimization of these or other sRNA pathways<sup>28-30</sup>.

192

## 193 **Materials and Methods**

### 194 gRNA construction and transformation

195 To increase the mutagenesis frequency in the targeted region, two target sites  
196 separated by 76 bp were selected for guide RNA (gRNA) construction, designed using  
197 the CRISPR Genome Analysis Tool as previously described<sup>14</sup>. Rice *U6* small nuclear  
198 RNA gene promoters (*PU6.1* and *PU6.2*) were used to drive the expression of each  
199 gRNA. Guide RNAs were first cloned into a pENTR vector using *BtgZI* and *BsaI* (New  
200 England BioLabs) restriction enzymes. These constructs were transferred using Gateway  
201 recombination to the binary vector containing the *Cas9* gene driven by the maize  
202 *Ubiquitin 1* promoter and the *bar* gene driven by 35S promoter<sup>14</sup>. The final construct was  
203 transformed into *Agrobacterium tumefaciens* for delivery into HiII maize immature  
204 embryos, followed by screening of positive calli as previously described<sup>14</sup>.

205

### 206 Characterization of transformants

207 DNA samples were extracted from Basta®-resistant calli and screened for  
208 mutations in the target region by PCR using primers *Dcl5\_F1* (5'-  
209 ATCTAGATCTCCAGACCATTGAACCCTGTC-3') and *Dcl5\_R1* (5'-  
210 GTATTCTAGACTTGAATAACCTGCTCTTTG-3'). Positive calli were transferred to  
211 regeneration media; multiple plants regenerated from the same callus were considered to  
212 be biological clones<sup>14</sup>. No chimeric plants were detected, consistent with Cas9 action in a  
213 single cell. Leaves from mature T<sub>0</sub> plants were genotyped for a second time using PCR  
214 amplification and Sanger sequencing to confirm the mutations. Over several generations  
215 families were established that segregated 1:1 for *dcl5*//+ fertile: *dcl5*//*dcl5* homozygous  
216 sterile individuals using standard maize genetic procedures.

217

### 218 Microscopy and imaging

219 For anther wall structure analysis with confocal microscopy, the anthers of  
220 precisely measured sizes were dissected and stored in 70% ethanol for fixation. Fixed  
221 anthers were then stained by propidium iodide and visualized on a Leica SP8 confocal  
222 microscope as previously described<sup>18</sup>. Meiocytes were extruded and stained by DAPI  
223 (4',6-diamindino-2-phenylindole) following published protocols<sup>31</sup>. The Alexander's  
224 staining solution<sup>32</sup> was used to test the viability of the pollen grains in the permissive  
225 conditions. TEM procedures were followed as described<sup>33</sup>, summarized as follows:  
226 anthers were dissected and fixed in fresh 0.1 M PIPES buffer (pH 6.8). A 2% osmium  
227 tetroxide stain was applied with brief washes, followed by dehydration in an acetone  
228 gradient. Specimens were infiltrated using a gradient of Spurr's resin (Sigma-Aldrich)  
229 and embedded. The sections were cut using a Leica UCT ultramicrotome, stained in urayl

230 and lead salts, and observed using a Zeiss TEM instrument with a LEO 912 AB energy  
231 filter.

232

### 233 ScaleP clearing of maize anthers

234 Maize anthers were fixed directly into 4% paraformaldehyde in phosphate-  
235 buffered saline (pH 7.4), and then prepared following the ScaleP protocol<sup>34</sup>. After 8 h  
236 KOH treatment, anthers were stained for a week at room temperature with 1 mM  
237 Calcofluor white for imaging of cell walls and 5  $\mu$ M Syto13 (ThermoFisher) for imaging  
238 nuclei. Samples were then cleared for three days with ScaleP solution consisting of 6 M  
239 urea, 30% (v/v) glycerol, and 0.1% (v/v) Triton X-100 in sterile water. Cleared samples  
240 were then imaged with a Zeiss 880 multi photon confocal microscope with a 40 $\times$  LD C-  
241 Apochromat water lens (numerical aperture of 1.1; working distance of 0.62 mm). The  
242 3D rendering was performed with Amira (FEI, ThermoFisher) software. Tapetal cells  
243 were classified as mononucleate or binucleate, and then artificially colored.

244

### 245 sRNA-seq and RNA-seq library construction and sequencing

246 Total RNA for sRNA-seq and RNA-seq libraries was isolated using the PureLink  
247 Plant RNA Reagent (ThermoFisher) following the manufacturer's instructions. Total  
248 RNA quality was assessed by denaturing agarose gel electrophoresis and quantified by  
249 the Qubit RNA BR Assay Kit (ThermoFisher). For library preparation, 20 to 30 nt RNAs  
250 were excised from a 15% polyacrylamide/urea gel, and ~25 ng of sRNA used for library  
251 construction with the TruSeq Small RNA Prep Kit (Illumina) following the

252 manufacturer's instructions. For RNA-seq, 2 µg of total RNA was treated with DNase I  
253 (New England BioLabs) and then cleaned with RNA Clean and Concentrator-5 (Zymo  
254 Research). The TruSeq Stranded Total RNA with RiboZero-Plant Kit (Illumina) was used  
255 for library construction with 500 ng of treated RNA, following the manufacturer's  
256 instructions. Sequencing in single-end mode on an Illumina HiSeq 2500 (University of  
257 Delaware) yielded 51 bp reads for both sRNA-seq and RNA-seq.

258

259 sRNA-seq data were processed as previously described<sup>35</sup>. Briefly, we first used  
260 Trimmomatic version 0.32 to remove the linker adaptor sequences<sup>36</sup>. The trimmed reads  
261 were then mapped to version 4 of the B73 maize genome using Bowtie<sup>37</sup>. Read counts  
262 were normalized to 20 million to allow for the direct comparison across libraries.  
263 phasiRNAs were designated based on a 24-nt length and mapping coordinates within the  
264 previously identified 176 *24-PHAS* loci<sup>1</sup>, updated to version 4 of the B73 genome using  
265 the assembly converter tool<sup>38</sup>. If a 24-nt phasiRNA did not uniquely map to the genome,  
266 we divided the abundance equally to each location to which the read mapped, i.e. a hits-  
267 normalized abundance. These hits-normalized abundances were then summed for each of  
268 the 176 loci to calculate the 24-nt phasiRNA abundances.

269

270 RNA-seq libraries were trimmed as above, and mapped to version 4 of the B73  
271 genome using Tophat version 2.0.12<sup>39</sup>. For differential expression analysis of genes, we  
272 assembled the transcripts using the Cufflinks package<sup>40</sup> and raw gene expression levels  
273 were quantified using featureCounts version 1.5.0<sup>41</sup> to generate count tables that were  
274 imported into R for statistical analysis<sup>42</sup>. Weakly expressed transcripts (fewer than 1

275 read) were filtered out, and the remaining transcripts were normalized using DEseq2 to  
276 finally identify a set of differentially expressed genes for anthers homozygous for each  
277 mutant allele<sup>43</sup>. Due to a lack of a replicate for the *dcl5-1* restrictive library, we  
278 calculated dispersions using the mean of libraries to identify differentially expressed  
279 transcripts without a complete set of replicates.

280

281 For differential expression analysis of the *PHAS* precursors, we were unable to  
282 assemble the transcripts that mapped to these regions because of the absence of  
283 annotation in any feature files. Instead, we conducted this analysis in parallel to the  
284 analysis of the sRNA data. We first normalized the mapped fragmented reads as counts  
285 per 15 million, and applied the hits-normalized abundance approach described above.  
286 Using the annotated *24-PHAS* loci (above), we then identified the summed abundance of  
287 RNA-seq transcript fragments that mapped to these regions to identify a representative  
288 abundance for each *24-PHAS* precursor. Replicate libraries were averaged together prior  
289 to the creation of the heatmap, and we added 1 to all abundances in order to prevent  
290  $\log_2(0)$  error while also giving the added benefit of removing negative log transformed  
291 values. Boxplots were generated for each replicate's log transformed values.

292

293

## 294 **References**

- 295 1. Zhai, J. *et al.* Spatiotemporally dynamic, cell-type-dependent premeiotic and meiotic  
296 phasiRNAs in maize anthers. *Proc. Natl. Acad. Sci.* **112**, 3146–3151 (2015).

- 297 2. Johnson, C. *et al.* Clusters and superclusters of phased small RNAs in the developing  
298 inflorescence of rice. *Genome Res.* **19**, 1429–1440 (2009).
- 299 3. Song, X. *et al.* Roles of DCL4 and DCL3b in rice phased small RNA biogenesis.  
300 *Plant J.* **69**, 462–474 (2012).
- 301 4. Song, X. *et al.* Rice RNA-dependent RNA polymerase 6 acts in small RNA  
302 biogenesis and spikelet development. *Plant J.* **71**, 378–389 (2012).
- 303 5. Nonomura, K.-I. *et al.* A germ cell specific gene of the *ARGONAUTE* family is  
304 essential for the progression of premeiotic mitosis and meiosis during sporogenesis in  
305 rice. *Plant Cell* **19**, 2583–94 (2007).
- 306 6. Komiya, R. *et al.* Rice germline-specific Argonaute MEL1 protein binds to  
307 phasiRNAs generated from more than 700 lincRNAs. *Plant J.* **78**, 385–397 (2014).
- 308 7. Nonomura, K.-I. Small RNA pathways responsible for non-cell-autonomous  
309 regulation of plant reproduction. *Plant Reprod.* **31**, 21–29 (2018).
- 310 8. Ono, S. *et al.* EAT1 transcription factor, a non-cell-autonomous regulator of pollen  
311 production, activates meiotic small RNA biogenesis in rice anther tapetum. *PLOS*  
312 *Genet.* **14**, e1007238 (2018).
- 313 9. Margis, R. *et al.* The evolution and diversification of Dicers in plants. *FEBS Lett.*  
314 **580**, 2442–2450 (2006).
- 315 10. Thompson, B. E. *et al.* The *dicer-like1* homolog *fuzzy tassel* is required for the  
316 regulation of meristem determinacy in the inflorescence and vegetative growth in  
317 maize. *Plant Cell* **26**, 4702–17 (2014).
- 318 11. Parent, J. S., Bouteiller, N., Elmayan, T. & Vaucheret, H. Respective contributions of  
319 Arabidopsis DCL2 and DCL4 to RNA silencing. *Plant J.* **81**, 223–232 (2015).

- 320 12. Daxinger, L. *et al.* A stepwise pathway for biogenesis of 24-nt secondary siRNAs and  
321 spreading of DNA methylation. *EMBO J.* **28**, 48–57 (2009).
- 322 13. Gascioli, V., Mallory, A. C., Bartel, D. P. & Vaucheret, H. Partially redundant  
323 functions of Arabidopsis DICER-like enzymes and a role for DCL4 in producing  
324 trans-acting siRNAs. *Curr. Biol.* **15**, 1494–1500 (2005).
- 325 14. Char, S. N. *et al.* An Agrobacterium-delivered CRISPR/Cas9 system for high-  
326 frequency targeted mutagenesis in maize. *Plant Biotechnol. J.* **15**, 257–268 (2017).
- 327 15. Sekhon, R. S. *et al.* Genome-wide atlas of transcription during maize development.  
328 *Plant J.* **66**, 553–563 (2011).
- 329 16. Stelpflug, S. C. *et al.* An expanded maize gene expression atlas based on RNA  
330 sequencing and its use to explore root development. *Plant Genome* **9**,  
331 doi:10.3835/plantgenome2015.04.0025 (2016).
- 332 17. Walley, J. W. *et al.* Integration of omic networks in a developmental atlas of maize.  
333 *Science* **353**, 814–818 (2016).
- 334 18. Zhang, H. *et al.* Transcriptomes and proteomes define gene expression progression in  
335 pre-meiotic maize anthers. *G3* **4**, 993–1010 (2014).
- 336 19. Kelliher, T. & Walbot, V. Maize germinal cell initials accommodate hypoxia and  
337 precociously express meiotic genes. *Plant J.* **77**, 639–652 (2014).
- 338 20. Nan, G.-L. *et al.* MS23, a master basic helix-loop-helix factor, regulates the  
339 specification and development of tapetum in maize. *Development* **144**, 163–172  
340 (2017).
- 341 21. Dukowic-Schulze, S. *et al.* Novel meiotic miRNAs and indications for a role of  
342 phasiRNAs in meiosis. *Front. Plant Sci.* **7**, 762 (2016).



- 343 22. Egger, R. L. & Walbot, V. Quantifying *Zea mays* L tassel development and  
344 correlation with anther developmental stages as a guide for experimental studies.  
345 *Maydica* **60**, (2015).
- 346 23. Schlenker, W. & Roberts, M. J. Nonlinear effects of weather on corn yields. *Rev.*  
347 *Agric. Econ.* **28**, 391–398 (2006).
- 348 24. Schlenker, W. & Roberts, M. J. Nonlinear temperature effects indicate severe  
349 damages to U.S. crop yields under climate change. *Proc. Natl. Acad. Sci.* **106**,  
350 15594–15598 (2009).
- 351 25. Zhou, H. *et al.* Photoperiod- and thermo-sensitive genic male sterility in rice are  
352 caused by a point mutation in a novel noncoding RNA that produces a small RNA.  
353 *Cell Res.* **22**, 649–660 (2012).
- 354 26. Fan, Y. *et al.* PMS1T, producing phased small-interfering RNAs, regulates  
355 photoperiod-sensitive male sterility in rice. *Proc. Natl. Acad. Sci.* **113**, 15144–15149  
356 (2016).
- 357 27. Ding, J. *et al.* A long noncoding RNA regulates photoperiod-sensitive male sterility,  
358 an essential component of hybrid rice. *Proc. Natl. Acad. Sci.* **109**, 2654–2659 (2012).
- 359 28. Vernoud, V. *et al.* The HD-ZIP IV transcription factor OCL4 is necessary for  
360 trichome patterning and anther development in maize. *Plant J.* **59**, 883–894 (2009).
- 361 29. Yu, J. *et al.* Two rice receptor-like kinases maintain male fertility under changing  
362 temperatures. *Proc. Natl. Acad. Sci.* **114**, 12327–12332 (2017).
- 363 30. Storme, N. D. & Geelen, D. The impact of environmental stress on male reproductive  
364 development in plants: biological processes and molecular mechanisms. *Plant Cell*  
365 *Environ.* **37**, 1–18 (2014).

- 366 31. Zhang, H. *et al.* Stable integration of an engineered megabase repeat array into the  
367 maize genome. *Plant J.* **70**, 357–365 (2012).
- 368 32. Alexander, M. P. Differential staining of aborted and nonaborted pollen. *Biotech.*  
369 *Histochem.* **44**, 117–122 (1969).
- 370 33. Wang, L. *et al.* Characterization and fine mapping of a necrotic leaf mutant in maize  
371 (*Zea mays* L.). *J. Genet. Genomics* **40**, 307–314 (2013).
- 372 34. Warner, C. A. *et al.* An optical clearing technique for plant tissues allowing deep  
373 imaging and compatible with fluorescence microscopy. *Plant Physiol.* **166**, 1684–  
374 1687 (2014).
- 375 35. Mathioni, S. M., Kakrana, A. & Meyers, B. C. Characterization of plant small RNAs  
376 by next generation sequencing. *Curr. Protoc. Plant Biol* **2**, 39–63 (2017).
- 377 36. Bolger, A. M., Lohse, M. & Usadel, B. Trimmomatic: A flexible trimmer for  
378 Illumina sequence data. *Bioinformatics* **30**, 2114–2120 (2014).
- 379 37. Kersey, P. J. *et al.* Ensembl Genomes 2016: more genomes, more complexity.  
380 *Nucleic Acids Res.* **44**, D574–D580 (2016).
- 381 38. Tello-Ruiz, M. K. *et al.* Gramene 2018: Unifying comparative genomics and pathway  
382 resources for plant research. *Nucleic Acids Res.* **46**, D1181–D1189 (2018).
- 383 39. Trapnell, C., Pachter, L. & Salzberg, S. L. TopHat: Discovering splice junctions with  
384 RNA-Seq. *Bioinformatics* **25**, 1105–1111 (2009).
- 385 40. Trapnell, C. *et al.* Transcript assembly and quantification by RNA-Seq reveals  
386 unannotated transcripts and isoform switching during cell differentiation. *Nat.*  
387 *Biotechnol.* **28**, 511–515 (2010).

- 388 41. Liao, Y., Smyth, G. K. & Shi, W. FeatureCounts: An efficient general purpose  
389 program for assigning sequence reads to genomic features. *Bioinformatics* **30**, 923–  
390 930 (2014).
- 391 42. R Development Core Team. *R: A language and environment for statistical*  
392 *computing*. R Foundation for Statistical Computing **1** (2011).
- 393 43. Love, M. I., Huber, W. & Anders, S. Moderated estimation of fold change and  
394 dispersion for RNA-seq data with DESeq2. *Genome Biol.* **15**, 550 (2014).

395

### 396 **Acknowledgments**

397 The *dcl5* CRISPR mutants were generously generated by Dr. Bing Yang's group  
398 at Iowa State University. TEM images were produced and imaged by Dr. Howard Berg at  
399 the Donald Danforth Plant Science Center. We thank the greenhouse staff at the Donald  
400 Danforth Plant Science Center for facilitating the temperature swap experiment, Sandra  
401 Mathioni for the preparation of small RNA and RNA-seq libraries, and Jeff Caplan for  
402 advice on microscopy. **Funding:** This work was supported by U.S. National Science  
403 Foundation Plant Genome Research Program (NSF-PGRP) award #1649424. Author  
404 contributions: H.Z., B.C.M, and V.W. conceived of the project, H.Z., C.T., and K.H.  
405 performed and interpreted experiments, R.Z. analyzed sequencing data, H.Z. and C.T.  
406 wrote the manuscript with editing by V.W., B.C.M, and with input from all co-authors.

407 **Competing Interests:** V.W. and B.C.M declare that a patent application was filed  
408 concerning the use of *Dcl5* for modulating male fertility. **Data and materials**

409 **availability:** Correspondence and requests for materials should be addressed to

410 walbot@stanford.edu. Raw data were submitted to GEO under GSE122449 (including

411 sRNA-seq as GSM3466686 to GSM3466700 and RNA-seq data as GSM3466701 to  
412 GSM3466714), and the processed data are available via our maize genome browser at  
413 <https://mpss.danforthcenter.org>.

## 414 Main Figures

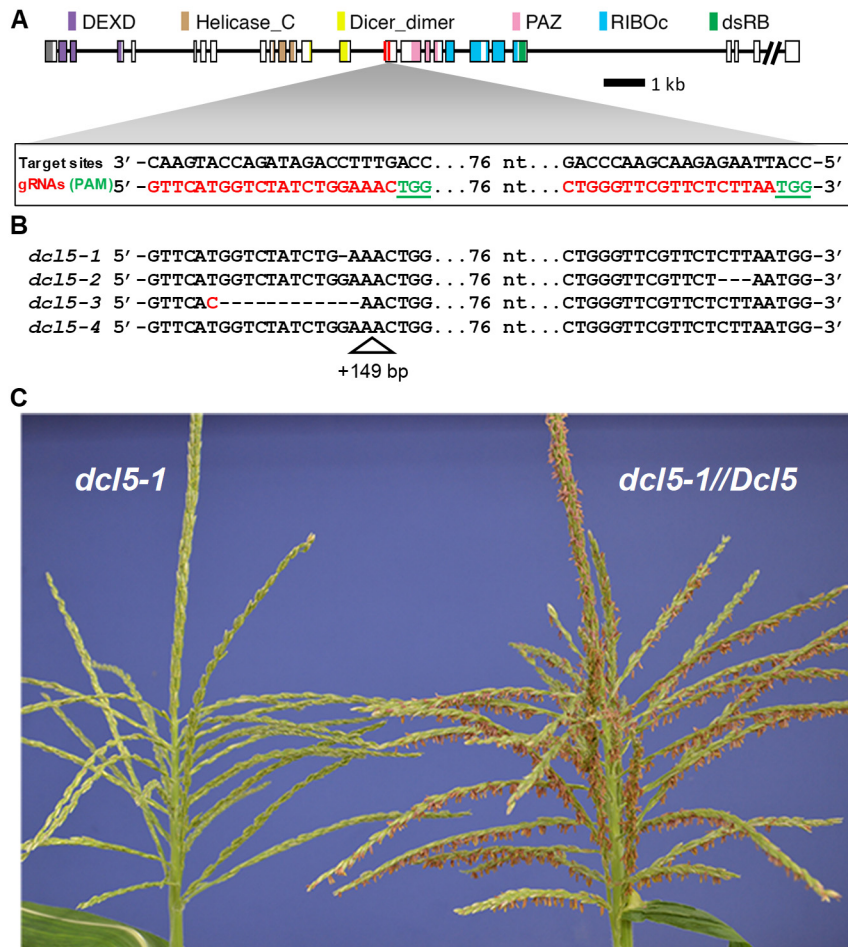

415

416 **Fig. 1. CRISPR-Cas9 was used in maize to mutate *Dcl5*.**

417 (A) Schematic diagram of the *Dcl5* gene model. Conserved domains were identified  
418 using the NCBI conserved domain search tool against database CDD v3.16. All domains  
419 were found with extremely high confidence except the double stranded RNA-binding  
420 (dsRB) domain, which had an e-value of 0.05. (B) Sequence of the four mutant alleles  
421 selected for this study. (C) A *dcl5-1* tassel lacking any exerted anthers (left) and a sibling  
422 heterozygous *dcl5-1//Dcl5* plant at peak pollen shed with hundreds of exerted anthers  
423 (right).

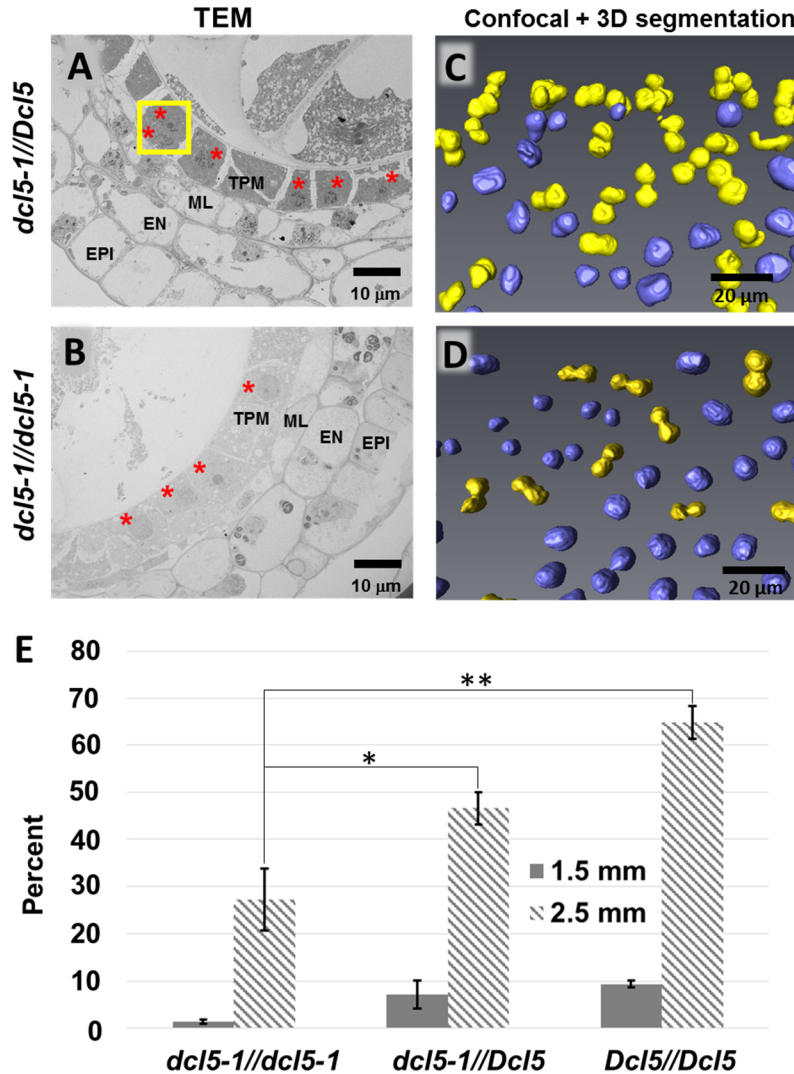

424

425 **Fig. 2. Tapetal cells in *dcl5-1* plants are delayed or arrested in achieving binucleate**  
426 **status.**

427 (A) Transmission electron microscopy (TEM) of a fertile *dcl5-1//Dcl5* 2 mm anther lobe.  
428 At this stage, the tapetal cells (TPM) are packed with dark staining materials, likely exine  
429 components later secreted onto haploid microspores. The middle layer (ML), endothelial  
430 (EN), and epidermal (EPI) cells are highly vacuolated. The orange boxes mark two  
431 binucleate tapetal cells in which both nuclei were visible (red dots). (B) TEM of a sterile  
432 *dcl5-1* anther lobe at the same stage, demonstrating distended, pale-staining, and

433 mononucleate tapetal cells. **(C)** *dcl5-1*, and **(D)** *dcl5-1//Dcl5*: three-dimensional  
434 reconstructions of cleared, 2.5 mm anthers stained with the nuclear marker Syto13.  
435 Individual nuclei of mononucleate tapetal cells are marked in purple, and bi-nucleate  
436 cells are marked in yellow. **(E)** Quantification of mono- and bi-nucleate cells in *dcl5-1*,  
437 *dcl5-1//Dcl5*, and wildtype siblings at the meiotic I (1.5 mm) and meiotic II (2.5 mm)  
438 stages, in a family segregating 1:2:1 ( $p$ -value:  $p < 0.05$  \*,  $p < 0.01$  \*\*)

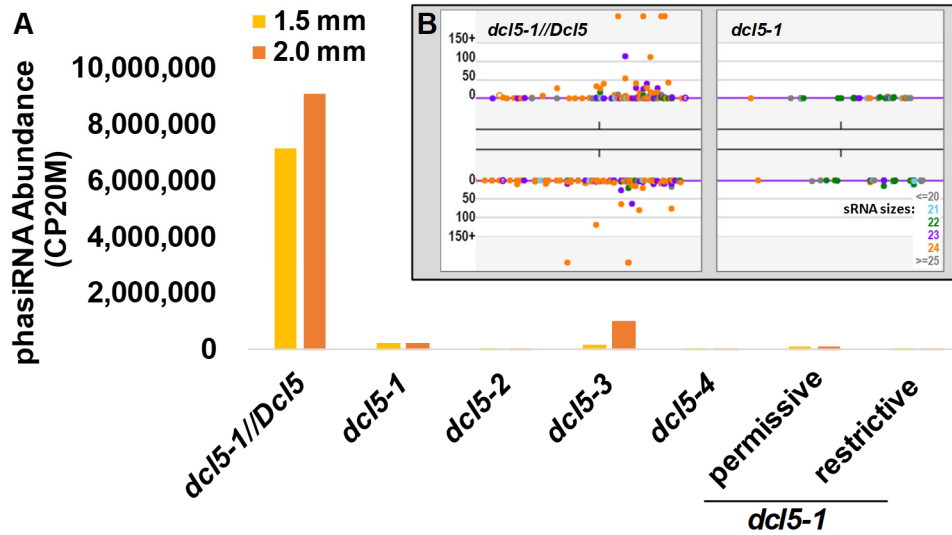

439 **Fig. 3. Near absence of 24-nt phasiRNAs in *dcl5* mutants.**

440 (A) Total 24-nt phasiRNAs from 176 24-PHAS loci are highly abundant in both  
441 2.0 mm fertile heterozygous anthers, and reduced by >99% in abundance in *dcl5-1*, *dcl5-*  
442 *2*, and *dcl5-4*, and by >90% in *dcl5-3* anthers. Altered temperature regimes do not restore  
443 24-phasiRNA abundances in either fertile (permissive) or sterile (restrictive) *dcl5-1*  
444 anthers (see main text). (B, inset) Representative 24-PHAS locus #12 (B73, v4; chr 1,  
445 178454619 bp) in a genome browser showing ~1.5 kbp with sRNAs in the fertile  
446 heterozygote (left) and *dcl5-1* (right). Orange dots are individual phasiRNAs; x-axis is  
447 genome position on top or bottom strand, y-axis is abundance in each genotype. Other  
448 colored dots are as indicated in the key, lower right.

449



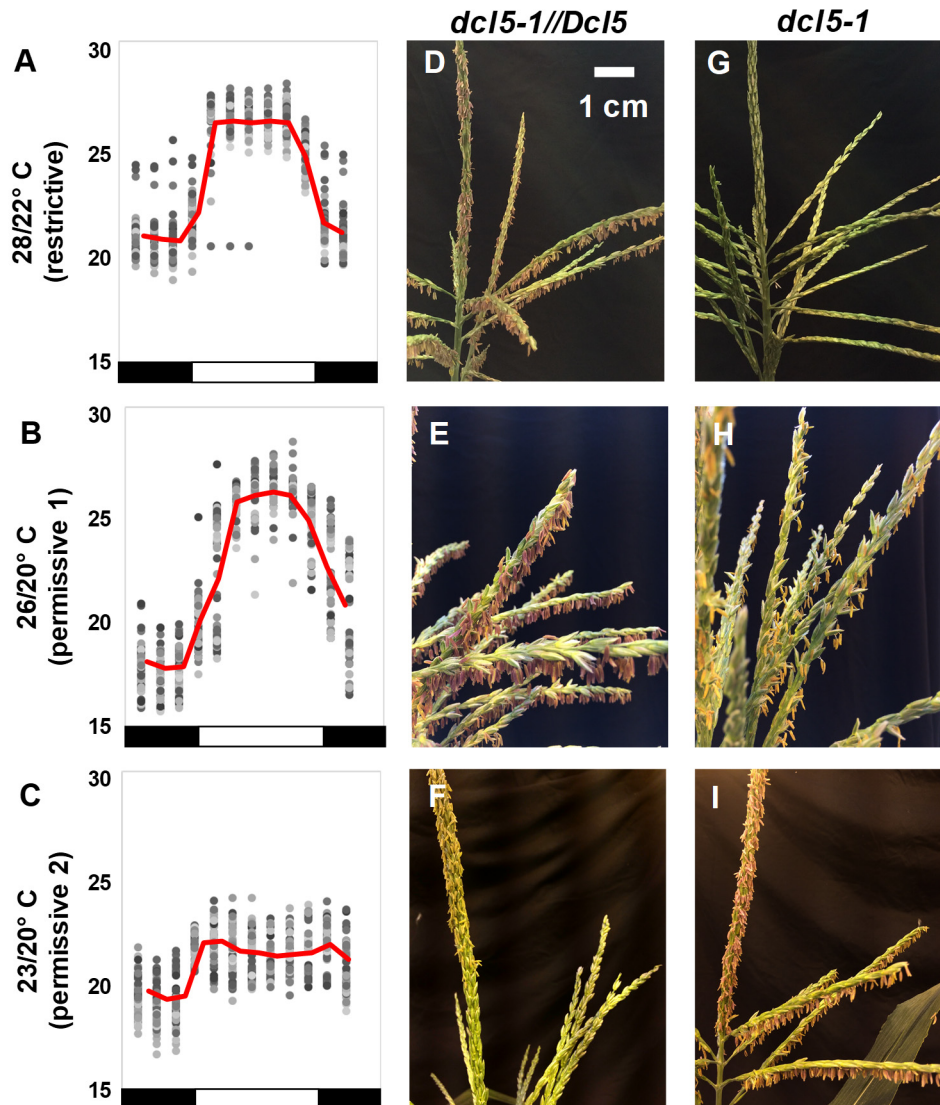

450 **Fig. 4. *dcl5-1* anther fertility is temperature sensitive.**

451 Three sets of *dcl5-1* and sibling *dcl5-1//Dcl5* plants grown in greenhouses with  
452 differing temperature regimes: 28°/22° C, 26°/20° C, or 23°/20° C (day/night). **(A, B, C)**  
453 Temperatures were recorded every 2 h for 60 days (grey dots, average in red; day/night  
454 indicated as white or black, below). **(D, E, F)** Heterozygous *dcl5-1//Dcl5* siblings were  
455 fully fertile under all three regimes. **(G, H, I)** *dcl5-1* plants in the restrictive regime **(G)**  
456 were completely male sterile, while those in permissive conditions were partially **(H)** or  
457 fully **(I)** fertile. Images were taken at 60±3 days after planting (DAP) (top row), 70±2

458 DAP (middle row), and  $71 \pm 3$  DAP (bottom row); the pace of tassel development is  
459 temperature-dependent and full anther exertion occurs at different times, for example **(F)**  
460 was photographed on the first day of anther exertion, a six-day process. The scale bar in  
461 **(A)** is approximate and pertains to all tassel images.
